# Supplementary material
Source: Frontiers journal article supplement (https://www.frontiersin.org/articles/265194)
Supplement: Table_1.PDF [file Table_1.PDF]

## *Supplementary Material*

### ***Mal de Río Cuarto virus* infection triggers the production of distinctive viral-derived siRNAs profiles in wheat and its planthopper vector**

**Luis Alejandro de Haro, Analía Delina Dumón, María Fernanda Mattio, Evangelina Beatriz Argüello Caro, Gabriela Llauger, Diego Zavallo, Hervé Blanc, Vanesa Claudia Mongelli, Graciela Truol, María-Carla Saleh, Sebastián Asurmendi, Mariana del Vas\***

**\*Correspondence:**

**Mariana del Vas:** [delvas.mariana@inta.gov.ar](mailto:delvas.mariana@inta.gov.ar)

**1 Supplementary Table S1.**

Mapping rates (as percentage of total reads in each library) to MRCV genome for each of the small RNA libraries used in this study. dpa: days post-acquisition; dpi: days post-infection. C: Control treatment, I: MRCV-infected treatment. The experiment was repeated twice (R1 and R2).

| Host               | Time point | Rep | No mismatch |       | up to 1 mismatch |        | up to 2 mismatches |        |
|--------------------|------------|-----|-------------|-------|------------------|--------|--------------------|--------|
|                    |            |     | C           | I     | C                | I      | C                  | I      |
| <i>D. kuscheli</i> | 21 dpa     | R1  | 0.00%       | 5.52% | 0.01%            | 8.52%  | 0.01%              | 9.14%  |
|                    |            | R2  | 0.00%       | 8.84% | 0.01%            | 11.87% | 0.01%              | 12.43% |
| Wheat              | 12 dpi     | R1  | 0.00%       | 2.04% | 0.01%            | 2.29%  | 0.31%              | 2.62%  |
|                    |            | R2  | 0.00%       | 0.77% | 0.01%            | 0.87%  | 0.26%              | 1.11%  |
|                    | 21 dpi     | R1  | 0.00%       | 4.63% | 0.01%            | 5.26%  | 0.14%              | 5.66%  |
|                    |            | R2  | 0.00%       | 3.96% | 0.00%            | 4.53%  | 0.15%              | 4.92%  |
